# Supplementary material for: Microvesicles from malaria-infected red blood cells activate natural killer cells via MDA5 pathway
Source: PubMed Central journal article supplement (PMC6171940; doi:10.1371/journal.ppat.1007298), 2018-10-04
Supplement: ppat.1007298.s004.pdf [file ppat.1007298.s004.pdf]

**S1 Table. Changes in activation markers, effector molecules, natural cytotoxicity receptors and adhesion molecules on R-NK and NR-NK cells following iRBC co-culture<sup>a</sup>.**

| Marker                        | R-NK       |            |    |                    | NR-NK      |            |    |                    |
|-------------------------------|------------|------------|----|--------------------|------------|------------|----|--------------------|
|                               | RBC        | iRBC       | n  | p-val <sup>b</sup> | RBC        | iRBC       | n  | p-val <sup>b</sup> |
| <b>CD69</b>                   | 16±11%     | 44.5±17.4% | 18 | <0.001             | 22.7±15.7% | 30.7±16.4% | 13 | 0.002              |
| <b>CD25</b>                   | 6.4±6.4%   | 22.4±14.8% | 11 | 0.002              | 6.8±1.9%   | 9±4.6%     | 7  | 0.185              |
| <b>CD107</b>                  | 6.2±3.6%   | 11.9±5.3%  | 11 | <0.001             | 7.8±3.5%   | 9.7±2.7%   | 7  | 0.018              |
| <b>Granulysin</b>             | 10.3±6.8%  | 20.7±14.4% | 19 | 0.001              | 15.8±11.5% | 16.9±11.5% | 12 | 0.359              |
| <b>IFN<math>\gamma</math></b> | 1.2±0.8%   | 5.3±3.9%   | 19 | <0.001             | 3.7±2.3%   | 3.9±2.3%   | 12 | 0.749              |
| <b>Perforin</b>               | 14.1±13.8% | 14±15.8%   | 17 | 0.932              | 11.2±10.5% | 15.8±15.5% | 7  | 0.064              |
| <b>NKp30</b>                  | 20.5±9.9%  | 20.3±7.8%  | 18 | 0.889              | 17.8±12.3% | 22±15.9%   | 7  | 0.158              |
| <b>NKp44</b>                  | 2.9±3.4%   | 2±2%       | 18 | 0.054              | 3.4±2.7%   | 4.8±4.1%   | 10 | 0.167              |
| <b>NKp46</b>                  | 63.6±15%   | 68.4±16%   | 17 | 0.034              | 61.7±21.1% | 67.5±15%   | 9  | 0.066              |
| <b>NKG2A</b>                  | 4.7±7.3%   | 5.6±8.2%   | 18 | 0.032              | 7.2±9.1%   | 9.8±10.4%  | 11 | 0.019              |
| <b>NKG2C</b>                  | 6.7±5.6%   | 7.1±5.9%   | 18 | 0.146              | 8.4±7.2%   | 10.8±6.7%  | 10 | 0.164              |
| <b>NKG2D</b>                  | 64.4±16.3% | 67.1±15.8% | 18 | 0.141              | 74.1±19.5% | 77.7±16.9% | 10 | 0.12               |
| <b>CD94</b>                   | 52±10.3%   | 56.3±8%    | 12 | 0.011              | 43.4±19.5% | 49.4±18.1% | 10 | 0.04               |
| <b>2B4</b>                    | 78.2±15.9% | 80.8±14.9% | 18 | 0.092              | 82.7±10.6% | 86.5±7.8%  | 7  | 0.033              |
| <b>CD36</b>                   | 1.4±1.9%   | 1.5±1.6%   | 16 | 0.893              | 1.9±1.9%   | 1.8±2.2%   | 7  | 0.84               |
| <b>CD11a</b>                  | 93±6.7%    | 93.1±6.4%  | 7  | 0.867              | 94.2±6.8%  | 95.1±5.7%  | 4  | 0.27               |
| <b>CD18</b>                   | 92.9±6.6%  | 93±6.3%    | 7  | 0.857              | 91.3±4.6%  | 93.3±4.1%  | 4  | 0.051              |
| <b>DNAM1</b>                  | 71.7±18.4% | 71±19.8%   | 8  | 0.528              | 88.8±10%   | 89.6±9.2%  | 4  | 0.378              |
| <b>CD2</b>                    | 71.2±12.9% | 70.3±13.7% | 8  | 0.513              | 73.1±16.3% | 72.1±16.5% | 4  | 0.356              |

<sup>a</sup> Numbers represent the mean±SD of the percentage of NK cells positive for the indicated marker.

<sup>b</sup> p values were calculated using a paired t-test.
