# Supplementary material for: Microvesicles from malaria-infected red blood cells activate natural killer cells via MDA5 pathway
Source: PubMed Central journal article supplement (PMC6171940; doi:10.1371/journal.ppat.1007298), 2018-10-04
Supplement: ppat.1007298.s005.pdf [file ppat.1007298.s005.pdf]

**S2 Table. Control of parasitemia across different *P. falciparum* strains by R-NK and NR-NK cells<sup>a</sup>.**

| Parasite     | R-NK                  |    | NR-NK                 |   | t-test             |
|--------------|-----------------------|----|-----------------------|---|--------------------|
|              | Parasitemia reduction | n  | Parasitemia reduction | n | p-val <sup>b</sup> |
| <b>3D7</b>   | 71±12%                | 11 | 25±7.7%               | 4 | <0.0001            |
| <b>HB3</b>   | 63±8.6%               | 8  | 27±17%                | 4 | 0.0005             |
| <b>W2mef</b> | 70±10%                | 8  | 29±14%                | 4 | 0.0001             |
| <b>T994</b>  | 68±12%                | 6  | 19±14%                | 4 | 0.0003             |

<sup>a</sup> Numbers represent the mean±SD.

<sup>b</sup> p values were calculated using Student's t-test.
