# Supplementary material for: Microvesicles from malaria-infected red blood cells activate natural killer cells via MDA5 pathway
Source: PubMed Central journal article supplement (PMC6171940; doi:10.1371/journal.ppat.1007298), 2018-10-04
Supplement: ppat.1007298.s006.pdf [file ppat.1007298.s006.pdf]

**S3 Table. List of differentially expressed genes (DEG) in NK cells of responders upon iRBC exposure compared to RBC.**

| ACCESSION      | SYMBOL  | logFC    | adj.P.Val# |
|----------------|---------|----------|------------|
| NM_001548.3    | IFIT1   | 4.426392 | 6.46E-07   |
| NM_006820.1    | IFI44L* | 4.401056 | 0.012936   |
| NM_000619.2    | IFNG    | 4.34097  | 0.001112   |
| NM_001031683.1 | IFIT3   | 3.462074 | 0.003645   |
| NM_001549.2    | IFIT3   | 3.308244 | 4.92E-05   |
| NM_006417.3    | IFI44   | 3.114047 | 0.007805   |
| NM_022872.2    | IFI6    | 2.981751 | 0.000146   |
| NM_002462.2    | MX1     | 2.972819 | 1.41E-05   |
| NM_006187.2    | OAS3    | 2.61062  | 0.000146   |
| NM_005101.1    | ISG15   | 2.55968  | 6.46E-07   |
| NM_001032409.1 | OAS1    | 2.463553 | 1.41E-05   |
| NM_080657.4    | RSAD2   | 2.449901 | 2.27E-06   |
| BQ437417       |         | 2.345501 | 9.31E-07   |
| NM_022873.2    | IFI6    | 2.344063 | 0.003147   |
| NM_001032409.1 | OAS1    | 2.325294 | 4.25E-06   |
| NM_199139.1    | XAF1*   | 2.120073 | 0.009578   |
| NM_017912.3    | HERC6   | 2.100254 | 0.00032    |
| NM_001547.4    | IFIT2   | 2.047891 | 0.007392   |
| NM_199139.1    | XAF1*   | 1.965249 | 0.035954   |
| NM_016323.2    | HERC5   | 1.894141 | 9.31E-07   |
| NM_002759.1    | EIF2AK2 | 1.811767 | 1.41E-05   |
| NM_004029.2    | IRF7    | 1.702383 | 0.00032    |
| NM_002534.2    | OAS1    | 1.69533  | 1.41E-05   |
| NM_001031683.1 | IFIT3   | 1.609319 | 0.00029    |
| NM_004029.2    | IRF7    | 1.599294 | 0.002649   |
| NM_002346.1    | LY6E    | 1.580198 | 0.000407   |

|                |         |          |          |
|----------------|---------|----------|----------|
| NM_002463.1    | MX2     | 1.530246 | 0.000208 |
| NM_016817.2    | OAS2    | 1.513264 | 0.000325 |
| NM_002535.2    | OAS2    | 1.50167  | 7.06E-05 |
| NM_001100422.1 | SPATS2L | 1.404516 | 0.00032  |
| NM_017631.4    | DDX60   | 1.368787 | 0.003673 |
| NM_033405.2    | PRIC285 | 1.272033 | 0.003673 |
| NM_001032731.1 | OAS2    | 1.258752 | 0.011175 |
| NM_024119.2    | DHX58   | 1.246834 | 0.003307 |
| NM_021105.1    | PLSCR1  | 1.230418 | 0.000467 |
| NM_207315.2    | CMPK2   | 1.201759 | 6.46E-07 |
| NM_022168.2    | IFIH1   | 1.188958 | 0.005372 |
| NM_006074.3    | TRIM22* | 1.09527  | 0.046464 |
| NM_012420.1    | IFIT5   | 1.08061  | 0.003307 |
| NM_030776.1    | ZBP1*   | 1.067086 | 0.01924  |
| NM_017654.2    | SAMD9   | 1.051433 | 0.003259 |
| NM_001548.2    | IFIT1   | 1.047809 | 0.001696 |
| NM_015907.2    | LAP3    | 1.040127 | 0.003307 |
| NM_016816.2    | OAS1    | 1.00549  | 0.00032  |
| NM_005082.4    | TRIM25  | 0.991267 | 0.003801 |
| NM_017554.1    | PARP14  | 0.989533 | 0.013337 |
| NM_001012967.1 | DDX60L* | 0.960957 | 0.019062 |
| NM_016817.2    | OAS2*   | 0.914638 | 0.002376 |
| NM_004510.2    | SP110   | 0.910701 | 0.005431 |
| NM_004510.2    | SP110*  | 0.899594 | 0.046464 |
| NM_015840.2    | ADAR*   | 0.855559 | 0.01495  |
| NM_001002010.1 | NT5C3*  | 0.787752 | 0.022796 |
| NM_016410.3    | CHMP5   | 0.780338 | 0.001092 |
| NM_016410.4    | CHMP5*  | 0.776057 | 0.008712 |
| NM_017414.3    | USP18*  | 0.775519 | 0.001092 |

|             |        |          |          |
|-------------|--------|----------|----------|
| NM_198576.2 | AGRN*  | 0.724888 | 0.012562 |
| NM_002468.3 | MYD88  | 0.66141  | 0.012936 |
| NM_152542.2 | PPM1K  | 0.596809 | 0.019521 |
| NM_016091.2 | EIF3L* | -0.70427 | 0.009578 |

# False discovery rate adjusted p-value. Adj. p value < 0.05 is considered as significant.

\* Denotes DEGs that are unique to the comparison between R-NK+iRBC and R-NK+RBC.
