# Supplementary material for: Microvesicles from malaria-infected red blood cells activate natural killer cells via MDA5 pathway
Source: PubMed Central journal article supplement (PMC6171940; doi:10.1371/journal.ppat.1007298), 2018-10-04
Supplement: ppat.1007298.s007.pdf [file ppat.1007298.s007.pdf]

**S4 Table. List of differentially expressed genes (DEG) in R-NK cells versus NR-NK cells following co-culture with iRBC.**

| ACCESSION      | SYMBOL  | logFC    | adj.P.Va#1 |
|----------------|---------|----------|------------|
| NM_001548.3    | IFIT1   | 3.824829 | 1.51E-05   |
| NM_000619.2    | IFNG    | 3.592687 | 0.017231   |
| NM_001549.2    | IFIT3   | 2.945553 | 0.00045    |
| NM_006417.3    | IFI44   | 2.941084 | 0.021278   |
| NM_001031683.1 | IFIT3   | 2.884268 | 0.045805   |
| NM_022872.2    | IFI6    | 2.720532 | 0.000634   |
| NM_002462.2    | MX1     | 2.591678 | 0.000175   |
| NM_006187.2    | OAS3    | 2.589089 | 0.000197   |
| NM_080657.4    | RSAD2   | 2.36329  | 1.30E-05   |
| NM_005101.1    | ISG15   | 2.34414  | 1.30E-05   |
| NM_001032409.1 | OAS1    | 2.252804 | 0.000136   |
| NM_022873.2    | IFI6    | 2.180179 | 0.009531   |
| NM_017912.3    | HERC6   | 2.094705 | 0.00045    |
| NM_001032409.1 | OAS1    | 2.052004 | 5.99E-05   |
| BQ437417       |         | 1.996662 | 3.24E-05   |
| NM_001547.4    | IFIT2   | 1.96577  | 0.017231   |
| NM_002534.2    | OAS1    | 1.810715 | 1.30E-05   |
| NM_002759.1    | EIF2AK2 | 1.658335 | 7.58E-05   |
| NM_002463.1    | MX2     | 1.657752 | 9.01E-05   |
| NM_016323.2    | HERC5   | 1.639694 | 1.51E-05   |
| NM_004029.2    | IRF7    | 1.471903 | 0.009483   |
| NM_001031683.1 | IFIT3   | 1.459757 | 0.001886   |
| NM_016817.2    | OAS2    | 1.455246 | 0.000755   |

|                |               |          |          |
|----------------|---------------|----------|----------|
| NM_001100422.1 | SPATS2L       | 1.449311 | 0.000272 |
| NM_002535.2    | OAS2          | 1.423938 | 0.000197 |
| NM_033405.2    | PRIC285       | 1.414428 | 0.001291 |
| NM_017631.4    | DDX60         | 1.402973 | 0.003902 |
| NM_004029.2    | IRF7          | 1.338296 | 0.009837 |
| NM_024119.2    | DHX58         | 1.261375 | 0.003902 |
| NM_021105.1    | PLSCR1        | 1.176727 | 0.001291 |
| NM_001032731.1 | OAS2          | 1.16718  | 0.037976 |
| NM_002346.1    | LY6E          | 1.166938 | 0.024244 |
| NM_001548.2    | IFIT1         | 1.12994  | 0.000634 |
| NM_022168.2    | IFIH1         | 1.087205 | 0.021278 |
| NM_207315.2    | CMPK2         | 0.988107 | 2.89E-05 |
| NM_015907.2    | LAP3          | 0.98403  | 0.009483 |
| NM_017654.2    | SAMD9         | 0.942738 | 0.016253 |
| NM_004510.2    | SP110         | 0.94273  | 0.005263 |
| NM_017554.1    | PARP14        | 0.934579 | 0.036791 |
| NM_016816.2    | OAS1          | 0.93434  | 0.00114  |
| NM_144975.3    | SLFN5*        | 0.927353 | 0.020143 |
| NM_012420.1    | IFIT5         | 0.909867 | 0.037976 |
| NM_005082.4    | TRIM25        | 0.843358 | 0.036791 |
| NM_002468.3    | MYD88         | 0.730022 | 0.006051 |
| NM_016410.3    | CHMP5         | 0.725742 | 0.003748 |
| XR_016363.2    | LOC643384*    | 0.632803 | 0.037976 |
| NM_152542.2    | PPM1K         | 0.578964 | 0.037976 |
| XM_001717833.1 | LOC100129334* | 0.558653 | 0.043459 |
| NM_006187.2    | OAS3*         | 0.556268 | 0.048904 |

|             |       |          |          |
|-------------|-------|----------|----------|
| NM_021249.3 | SNX6* | 0.389579 | 0.025682 |
|-------------|-------|----------|----------|

# False discovery rate adjusted p-value. Adj. p value < 0.05 is considered as significant.

\* Denotes DEGs that are unique to the comparison between R-NK+iRBC and NR-NK+iRBC.
